# Supplementary material
Source: Springer Nature journal article supplement (https://www.springermedizin.de/resource/supplementary/12889_2014_7021_MOESM1_ESM.pdf/9499628)

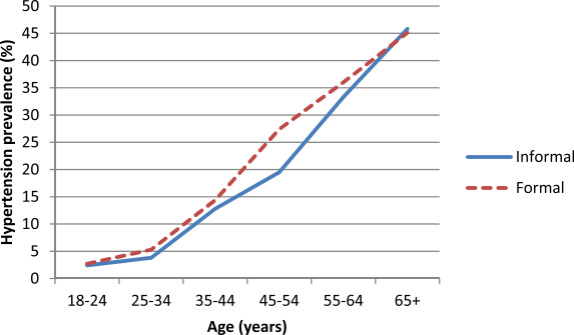

Supplement: MOESM1 [file 9499628]
